# Supplementary material for: Rational design and regulation of tremella-like selenium-doped MoS2 for highly reversible sodium storage
Source: Royal Society of Chemistry journal article supplement (doi:10.1039/d2ta08777d), 2022-12-22
Supplement: d2ta08777d1.pdf [file d2ta08777d1.pdf]

Supporting Information

**Rational Design and Regulation of Tremella-liked Selenium Doping  
MoS<sub>2</sub> for Highly Reversible Sodium Storage**

Ruiyu Zhu<sup>a</sup>, Shiyong Li<sup>b</sup>, Lixiang Li<sup>b</sup>, Chengxin Liu<sup>b</sup>, Xiaojie Liu<sup>\*.b</sup>

<sup>a</sup>School of Chemistry and Chemical Engineering, Xi'an University of Architecture and Technology, Xi'an 710055, P. R. China

<sup>b</sup>Key Laboratory of Synthetic and Natural Functional Molecule (Ministry of Education), College of Chemistry & Materials Science, Shaanxi Joint Lab of Graphene (NWU), Northwest University, Xi'an 710127, P. R. China

\*Corresponding author.

E-mail address: xiaojie.liu@nwu.edu.cn

## **S1 Experimental section**

### **Synthesis of Mo-glycerate (MoG) nanospheres**

All reagents have not undergone any treatment before used. In a typical synthesis of MoG spheres, 8 mL of glycerol and 60 mg of molybdenyl acetoacetonate ( $\text{MoO}_2(\text{acac})_2$ ) were dispersed in 20 mL of isopropanol (IPA)/  $\text{H}_2\text{O}$  (V/V = 3:1) under vigorous stirring and then uniform dispersion can obtain after sonicated for 20 min. The mixture was kept at 190 °C for 3 h in 50 mL Teflon-lined stainless steel autoclave. After cooling down, the product was collected after ethanol washing and dried at 80 °C for 24 h under vacuum.

### **Synthesis of $\text{MoS}_2$ hollow hierarchical nanospheres**

20 mg of dark brownish MoG powder and 40 mg of thiourea were added into 40 mL of solution with ethanol (EtOH)/  $\text{H}_2\text{O}$  (V/V = 3:1). The mixture solution was then kept at 200 °C for 6 h in 50 mL Teflon-lined stainless-steel autoclave. The product obtained from hydrothermal process were centrifuged, washed and dried.

### **Synthesis of hollow hierarchical selenium doping $\text{MoS}_2$ nanospheres ( $\text{MoS}_{2(1-x)}\text{Se}_{2x}$ )**

In a typical process of selenization, the  $\text{MoS}_2$  spheres were grinding evenly with selenium powder, and then the mixture was annealed under Ar/  $\text{H}_2$  atmosphere for 2 h at 650 °C. With different molar ratios of  $\text{MoS}_2$  precursor and selenium powder, the corresponding products denoted as  $\text{MoS}_{1.8}\text{Se}_{0.2}$ ,  $\text{MoS}_{1.5}\text{Se}_{0.5}$ ,  $\text{MoSSe}$  can be acquired.

### **Synthesis of $\text{MoS}_{2(1-x)}\text{Se}_{2x}$ with carbon coating ( $\text{MoS}_{2(1-x)}\text{Se}_{2x}$ @C)**

20 mg of  $\text{MoS}_{2(1-x)}\text{Se}_{2x}$  was added into a mixed solution of absolute ethanol (48 ml) and deionized water (2 ml) under vigorously stirring for 5 min. Then, 21 mg of resorcinol and 0.56 ml of formaldehyde were added into the solution, and kept vigorously stirring for 24 h. The product was centrifugated and washed by ethanol for three times, and then dried at 80 °C for 24 h. The final product was obtained after annealed under Ar atmosphere for 2 h at 700 °C with 5 °C  $\text{min}^{-1}$ .

## **S2 Materials characterization**

The morphologies and microstructures of the as prepared samples were recorded by scanning electron microscopy (SEM, Hitachi SU8010) and transmission electron

microscopy (TEM, JEOL JEM-3010). The crystal structures data of these samples were obtained by Bruker D8 ADVANCE X-ray powder diffraction (Cu K $\alpha$  radiation). Thermo-gravimetric analysis (TGA; SDTQ600) was performed in air atmosphere within temperature range from room temperature to 800°C with heating rate of 10°C min<sup>-1</sup>. Raman spectra data were obtained by Nicolet Almega dispersive Raman spectrometer with laser source of 532 nm. Brunauer-Emmett-Teller (BET) surface area and pore size distributions data were obtained by ASAP 2020 PLUS HD88 instrument. X-ray photoelectron spectroscopies (XPS) analyses were performed by PHI5000 Versa Probe III XPS with Al K $\alpha$  as excitation source.

### **S3 Electrochemical measurements**

The electrochemical performance of CR2025- type coin cells was tested by assembly in a glove box filled with high purity Ar (O<sub>2</sub> < 0.1 ppm, H<sub>2</sub>O < 0.1 ppm), in which the sample was anode material and sodium foil was counter electrodes. To prepare the working electrodes, a homogenous slurry with composition of the prepared active materials (samples), acetylene black, and carboxy methyl cellulose (CMC) in a weight ratio of 7 : 2 : 1 were grinded carefully in ethanol and water. The as prepared slurries were coated uniformly on nickel foam and dried at 80 °C for 12 h under vacuum. The average active material mass loading on the as prepared anode was 1.0 mg cm<sup>-2</sup>. The electrolyte was prepared by adding 1 M NaClO<sub>4</sub> in solution with ethylene carbonate (EC) /propylene carbonate (PC) (1:1) and 5 wt% fluoroethylene carbonate (FEC) as the additive. The glass fiber film was used as separator between the Na and working electrodes. The cyclic voltammetry (CV) was carried out with scan rate from 0.2 to 2.0 mV s<sup>-1</sup> to analyze the chemical transformation during the charge/ discharge progress, the electrochemical impedance spectrum (EIS) analysis was performed on a CHI 660D electrochemical workstation.

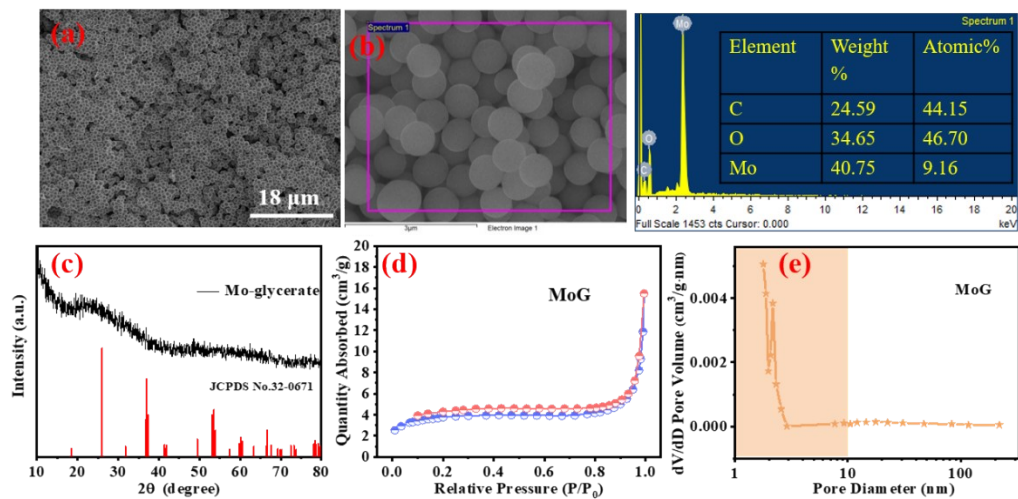

**Fig. S1.** Morphology/ composition characterization of MoG: (a) SEM. (b) SEM-EDX. (c) XRD pattern. (d,e) Nitrogen adsorption/desorption isotherms matching with BJH pore size distribution.

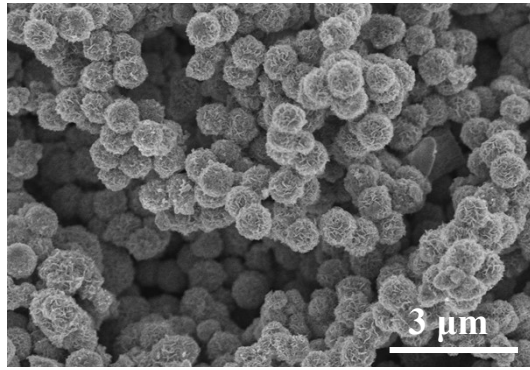

**Fig. S2.** Low magnification SEM images of MoS<sub>2</sub>.

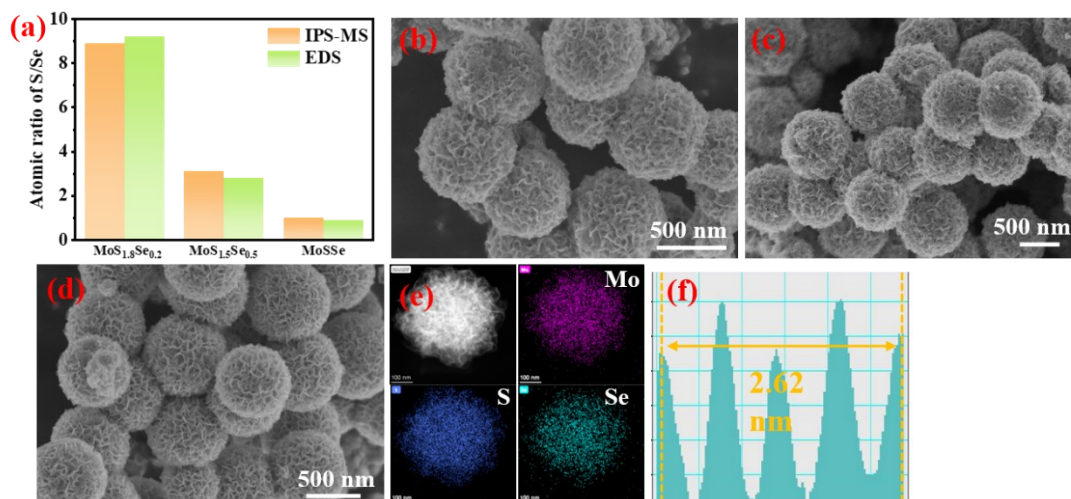

**Fig. S3.** (a) Atomic ratio of the S/Se from IPS-MS and EDS. SEM images of (b) MoS<sub>1.8</sub>Se<sub>0.2</sub>, (c) MoSSe, (d) MoS<sub>1.5</sub>Se<sub>0.5</sub>. (e) Element mapping, (f) Intensity profile across lattice fringes of MoS<sub>1.5</sub>Se<sub>0.5</sub>.

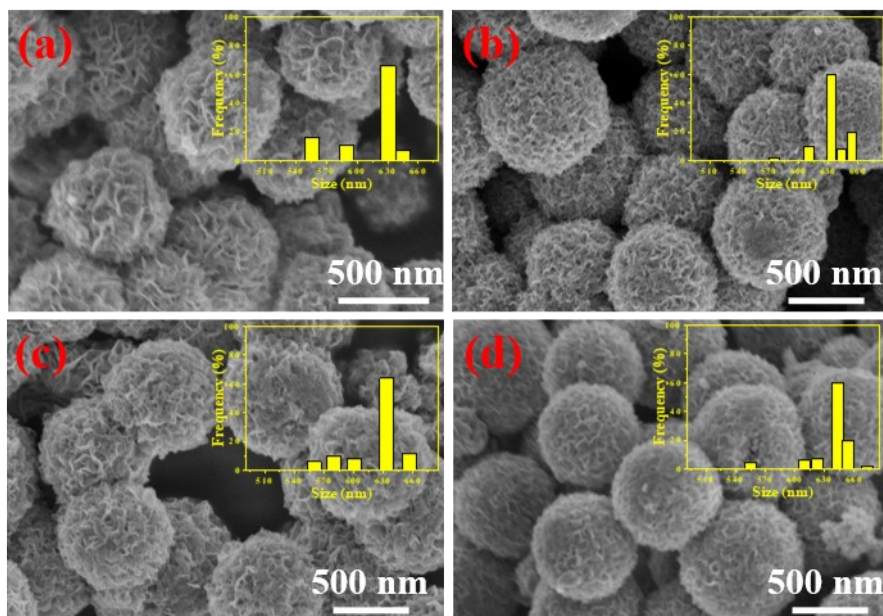

**Fig. S4.** (a-d) SEM images and particle size distribution of  $\text{MoS}_2@\text{C}$ ,  $\text{MoS}_{1.8}\text{Se}_{0.2}@\text{C}$ ,  $\text{MoS}_{1.5}\text{Se}_{0.5}@\text{C}$  and  $\text{MoSSe}@\text{C}$ .

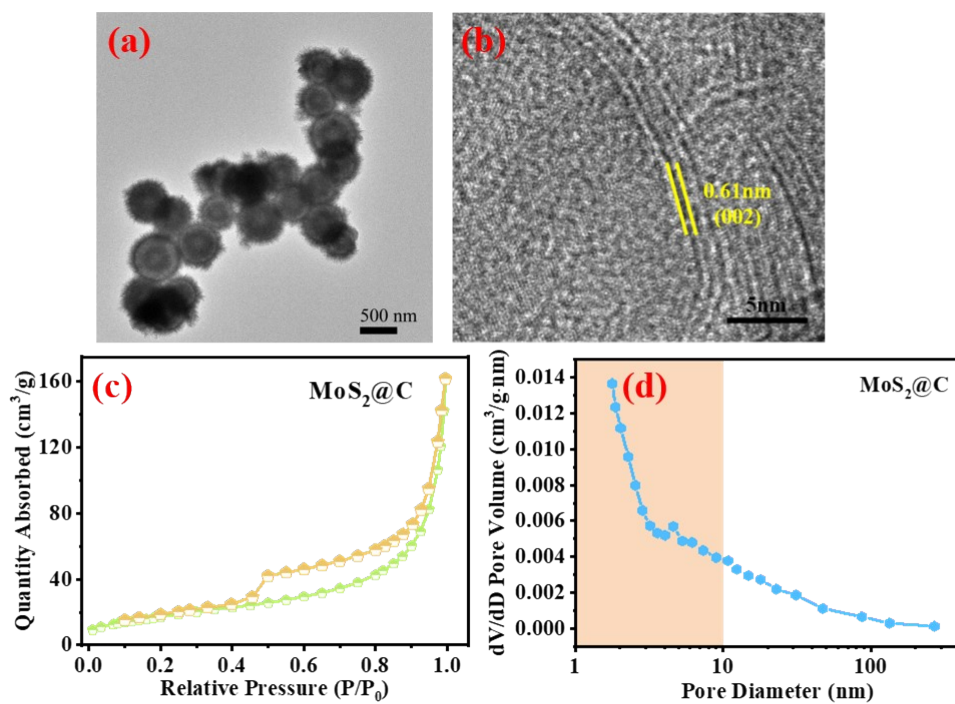

**Fig. S5.** Morphology/ composition characterization of MoS<sub>2</sub>@C: (a) TEM. (b) HRTEM. (c,d) Nitrogen adsorption/desorption isotherms matching with BJH pore size distribution.



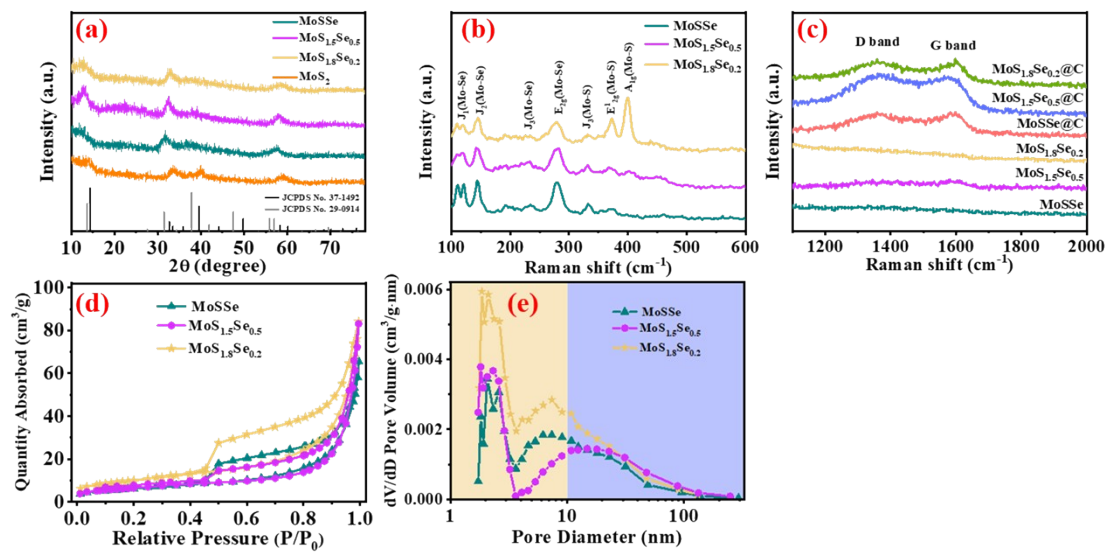

**Fig. S6.** (a) XRD pattern of  $\text{MoS}_2$ ,  $\text{MoS}_{1.8}\text{Se}_{0.2}$ ,  $\text{MoS}_{1.5}\text{Se}_{0.5}$  and  $\text{MoSSe}$ . (b,c) Raman spectra. (d,e) Nitrogen adsorption/desorption isotherms matching with BJH pore size distribution of  $\text{MoS}_{1.8}\text{Se}_{0.2}$ ,  $\text{MoS}_{1.5}\text{Se}_{0.5}$  and  $\text{MoSSe}$ .

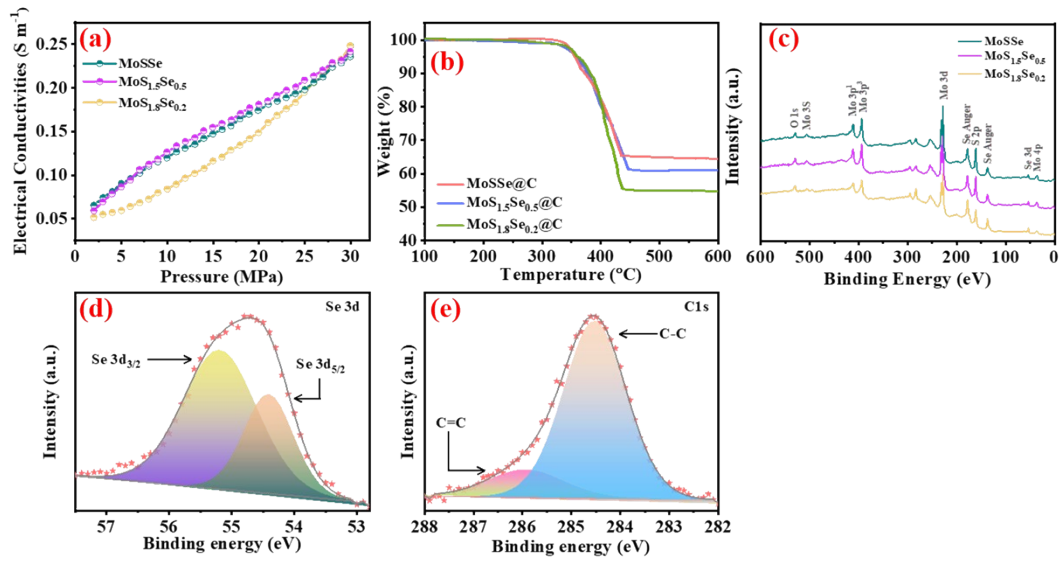

**Fig. S7.** (a) Electronic conductivities of MoS<sub>1.8</sub>Se<sub>0.2</sub>, MoS<sub>1.5</sub>Se<sub>0.5</sub> and MoSSe. (b) TGA of MoS<sub>1.8</sub>Se<sub>0.2</sub>@C, MoS<sub>1.5</sub>Se<sub>0.5</sub>@C and MoSSe@C. (c) XPS full spectra of MoS<sub>1.8</sub>Se<sub>0.2</sub>, MoS<sub>1.5</sub>Se<sub>0.5</sub> and MoSSe. (d) Se 3d and (e) C 1s High- resolution XPS spectra of MoS<sub>1.5</sub>Se<sub>0.5</sub>@C.

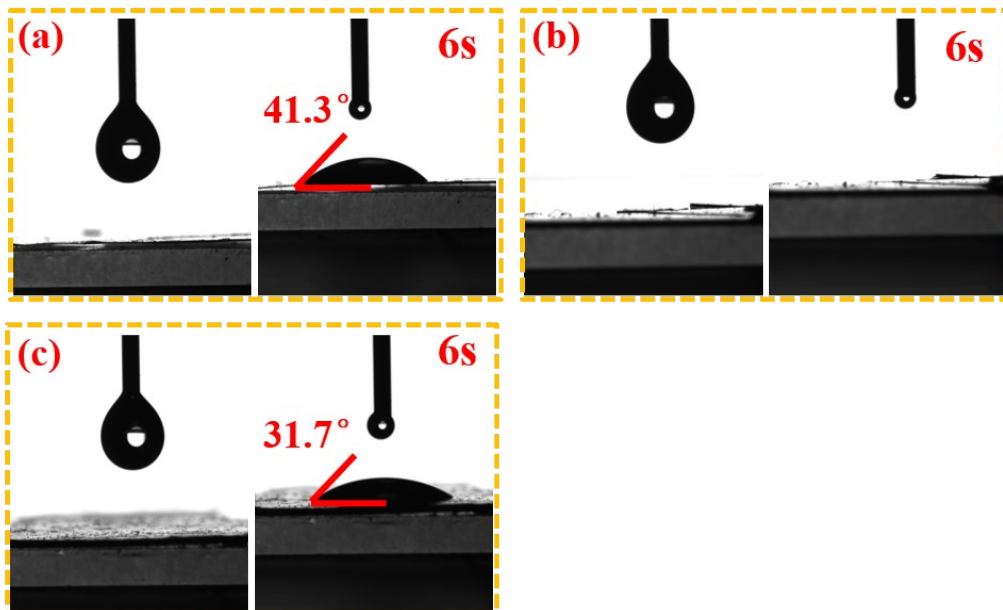

**Fig. S8.** Surface wet ability for a NaClO<sub>4</sub> droplet on (a) MoS<sub>1.8</sub>Se<sub>0.2</sub>@C, (b) MoS<sub>1.5</sub>Se<sub>0.5</sub>@C, (c) MoSSe@C surface.

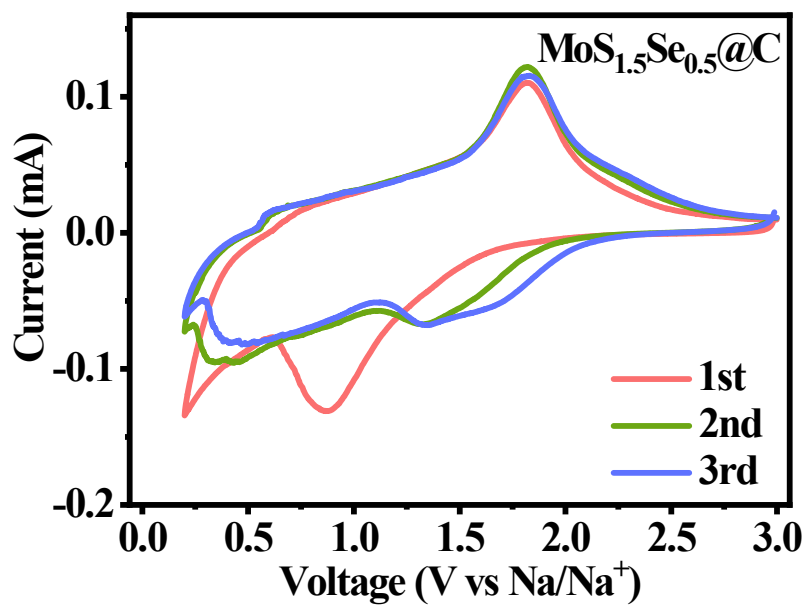

**Fig. S9.** Initial three cycles CV curves of  $\text{MoS}_{1.5}\text{Se}_{0.5}@C$  when the voltage range is set at 0.2- 3V.

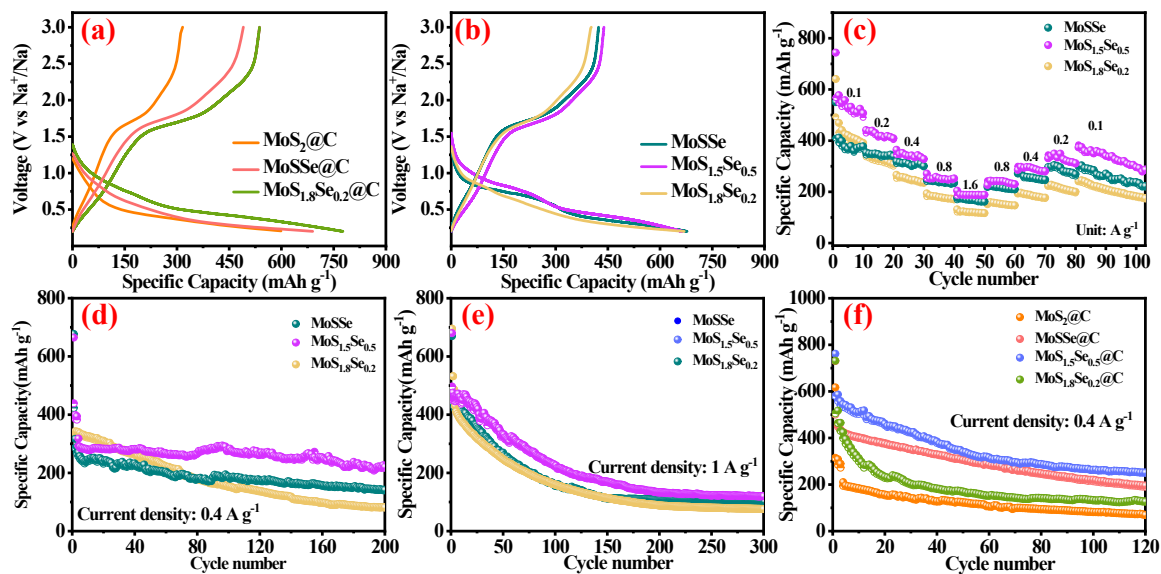

**Fig. S10.** Initial discharge and charge cycle of (a)  $\text{MoS}_2@\text{C}$ ,  $\text{MoS}_{1.8}\text{Se}_{0.2}@\text{C}$  and  $\text{MoSSe}@\text{C}$ , (b)  $\text{MoS}_{1.8}\text{Se}_{0.2}$ ,  $\text{MoS}_{1.5}\text{Se}_{0.5}$  and  $\text{MoSSe}$ . (c) Rate performance, (d,e) Cycles property of  $\text{MoS}_{1.8}\text{Se}_{0.2}$ ,  $\text{MoS}_{1.5}\text{Se}_{0.5}$  and  $\text{MoSSe}$ . (f) Cycles property of  $\text{MoS}_2@\text{C}$ ,  $\text{MoS}_{1.8}\text{Se}_{0.2}@\text{C}$ ,  $\text{MoS}_{1.5}\text{Se}_{0.5}@\text{C}$  and  $\text{MoSSe}@\text{C}$  at 0.005-3V.

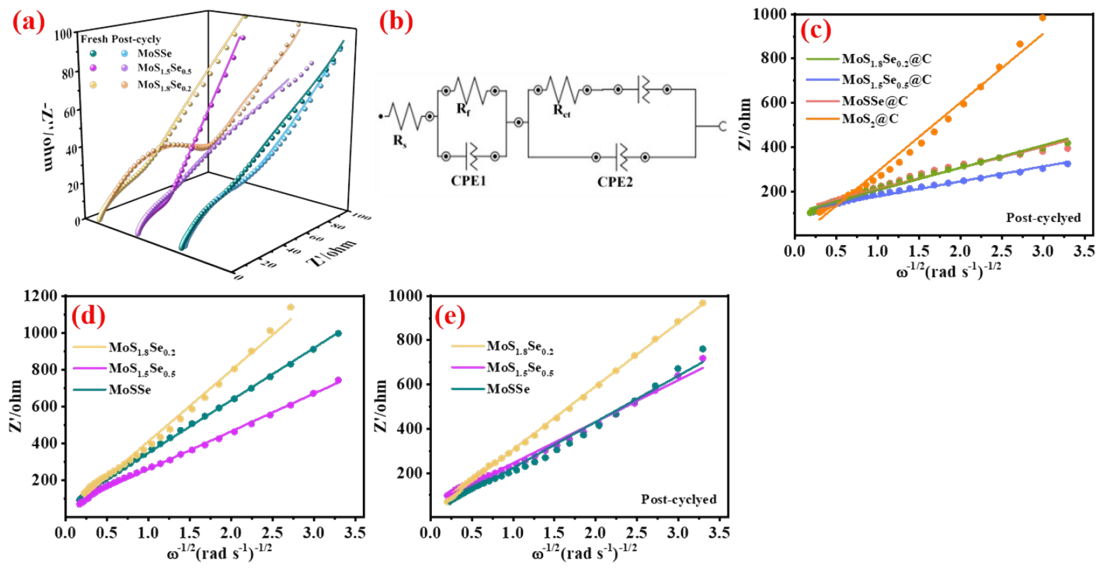

**Fig. S11.** (a) EIS pattern of fresh and post-cycled  $\text{MoS}_{1.8}\text{Se}_{0.2}$ ,  $\text{MoS}_{1.5}\text{Se}_{0.5}$  and  $\text{MoSSe}$ . (b) Equivalent circuit model corresponding with EIS curves. Fitting  $Z'$  and  $\omega^{-1/2}$  of (c) post-cycled  $\text{MoS}_2@\text{C}$ ,  $\text{MoS}_{1.8}\text{Se}_{0.2}@\text{C}$ ,  $\text{MoS}_{1.5}\text{Se}_{0.5}@\text{C}$  and  $\text{MoSSe}@\text{C}$ , (d,e) fresh and post-cycled  $\text{MoS}_{1.8}\text{Se}_{0.2}$ ,  $\text{MoS}_{1.5}\text{Se}_{0.5}$  and  $\text{MoSSe}$ .

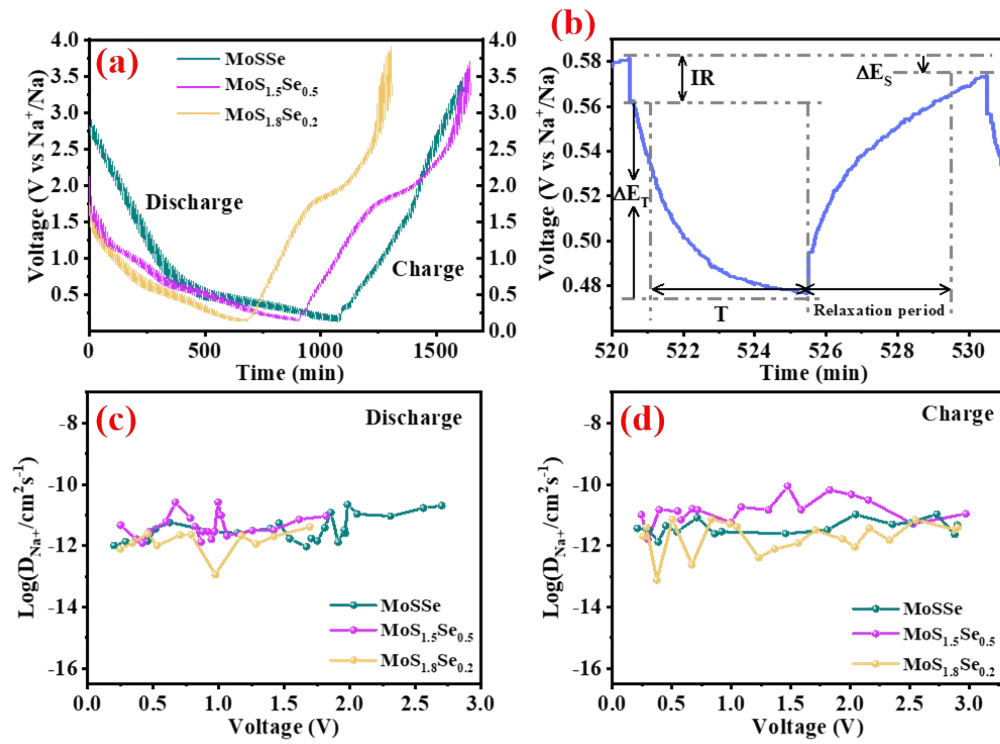

**Fig. S12.** (a) GITT curves of MoS<sub>1.8</sub>Se<sub>0.2</sub>, MoS<sub>1.5</sub>Se<sub>0.5</sub> and MoSSe. (b) partial enlarged GITT curves. (c,d) Na<sup>+</sup> diffusion coefficient of MoS<sub>1.8</sub>Se<sub>0.2</sub>, MoS<sub>1.5</sub>Se<sub>0.5</sub> and MoSSe.

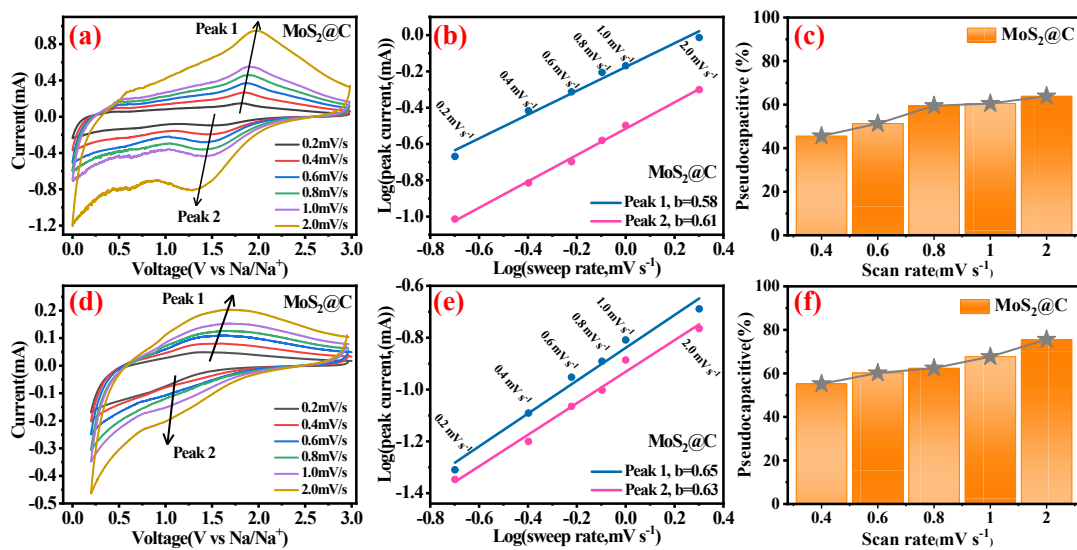

**Fig. S13.** Electrode kinetics analysis of MoS<sub>2</sub>@C: Different scan speeds CV curves, Log *i* versus log *v* plots, percent of pseudocapacitance contribution bar chart exhibited during different cutoff voltages of (a-c) 0.005- 3V, (d-f) 0.2- 3V.



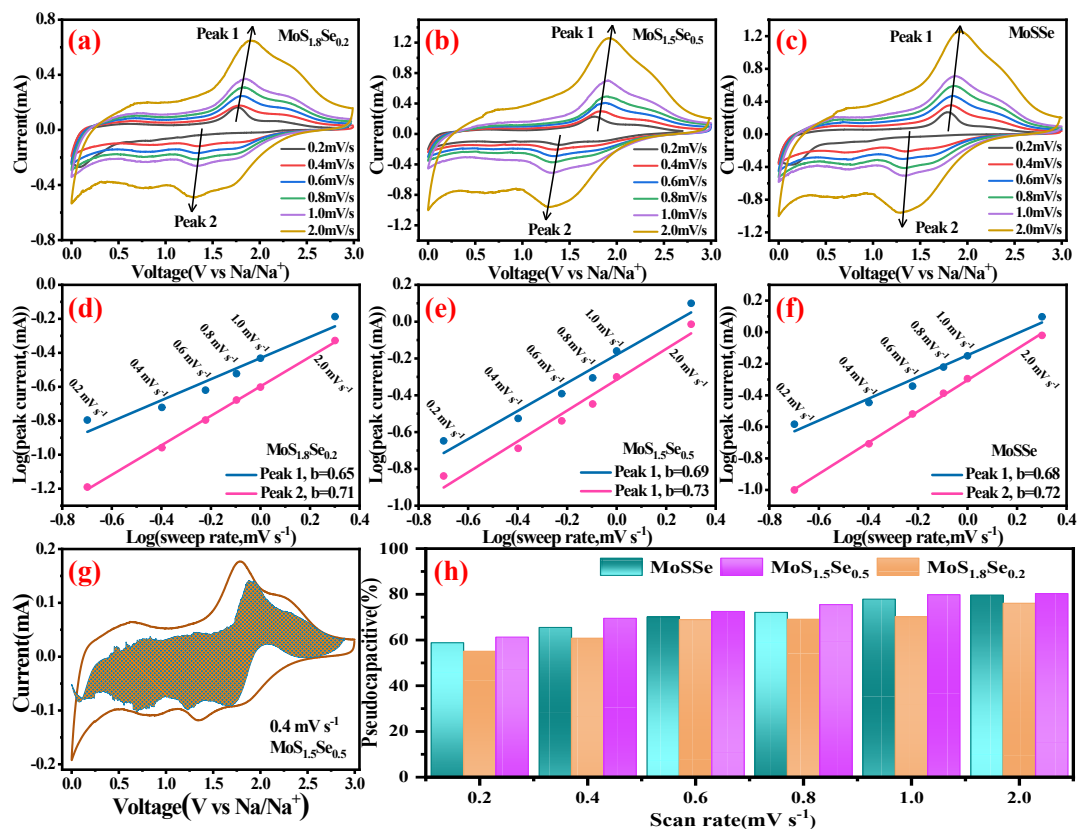

**Fig. S14.** Electrode kinetics analysis when discharge to 0.005V: (a-c) Different scan speeds CV curves, (d-f)  $\text{Log} i$  versus  $\text{log} v$  plots of  $\text{MoS}_{1.8}\text{Se}_{0.2}$ ,  $\text{MoS}_{1.5}\text{Se}_{0.5}$  and  $\text{MoSSe}$ . (g) Capacitance control exhibited used shaded region of  $\text{MoS}_{1.5}\text{Se}_{0.5}$ . (h) Percent of pseudocapacitance contribution bar chart exhibited of  $\text{MoS}_{1.8}\text{Se}_{0.2}$ ,  $\text{MoS}_{1.5}\text{Se}_{0.5}$  and  $\text{MoSSe}$ .

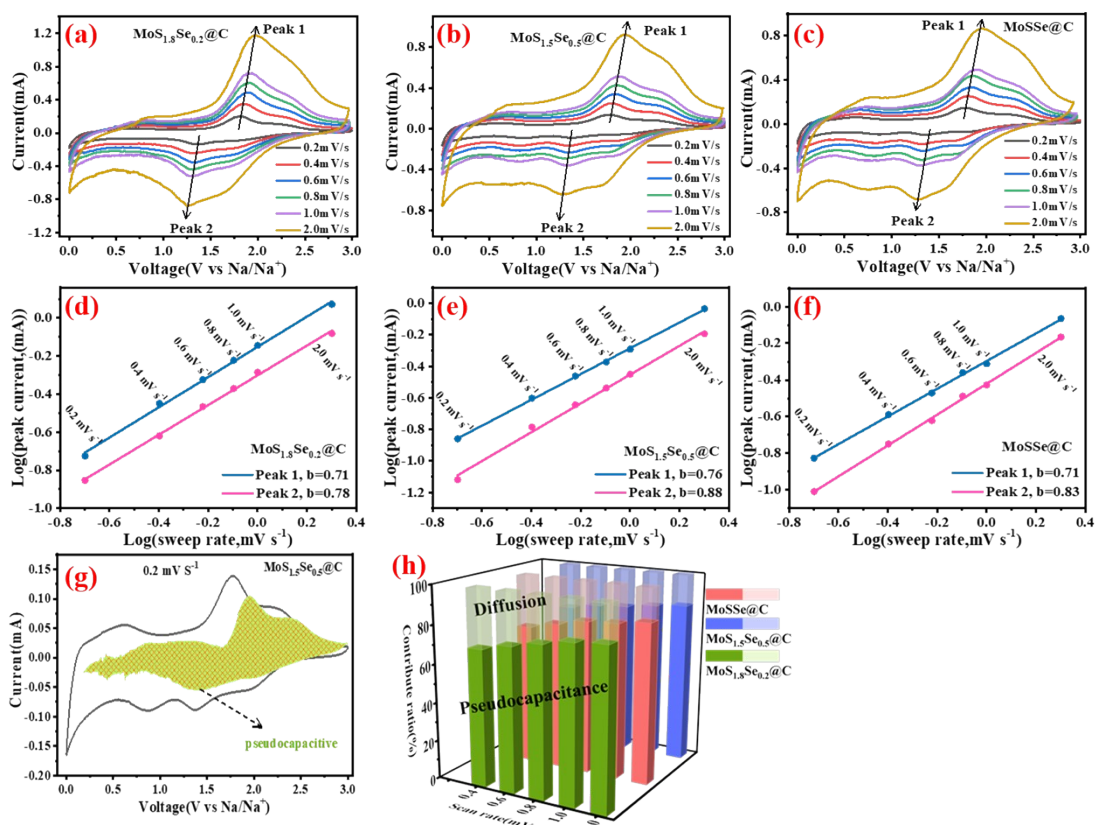

**Fig. S15.** Electrode kinetics analysis when discharge to 0.005V: (a-c) Different scan speeds CV curves, (d-f) Log  $i$  versus log  $v$  plots of  $\text{MoS}_{1.8}\text{Se}_{0.2}@C$ ,  $\text{MoS}_{1.5}\text{Se}_{0.5}@C$  and  $\text{MoSSe}@C$ . (g) Capacitance control exhibited used shaded region of  $\text{MoS}_{1.5}\text{Se}_{0.5}@C$ . (h) Percent of pseudocapacitance contribution bar chart exhibited of  $\text{MoS}_{1.8}\text{Se}_{0.2}@C$ ,  $\text{MoS}_{1.5}\text{Se}_{0.5}@C$  and  $\text{MoSSe}@C$ .

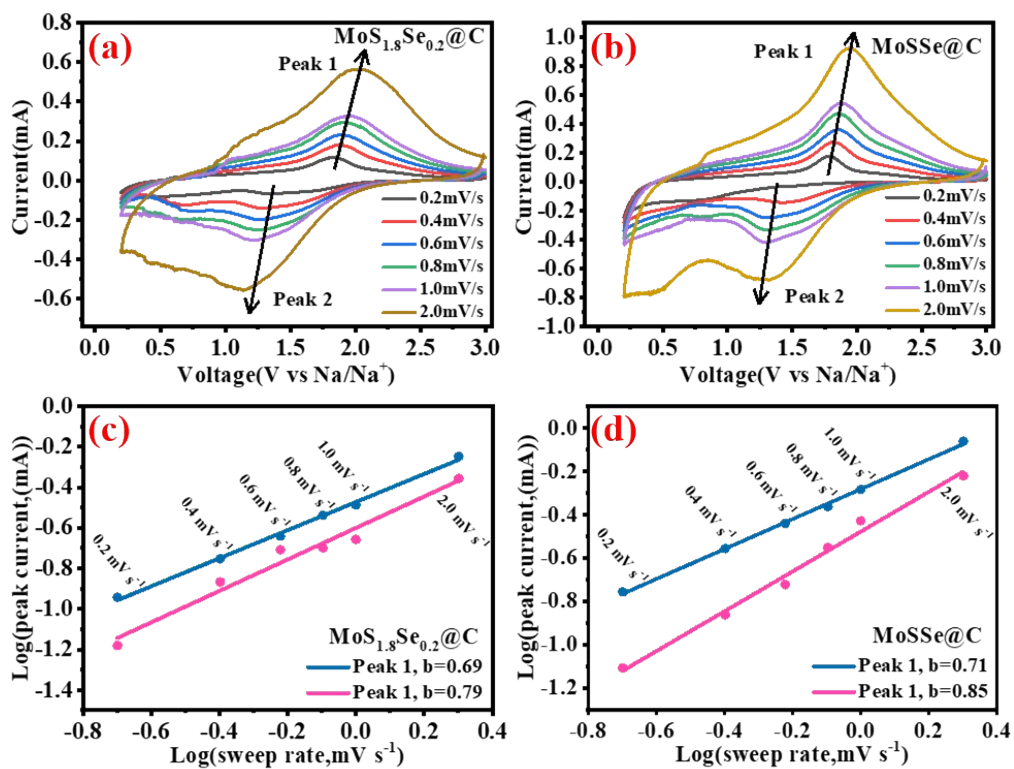

**Fig. S16.** Electrode kinetics analysis when discharge to 0.2V: (a,b) Different scan speeds CV curves, (c,d) Log  $i$  versus log  $v$  plots of  $\text{MoS}_{1.8}\text{Se}_{0.2}@C$  and  $\text{MoSSe}@C$ .

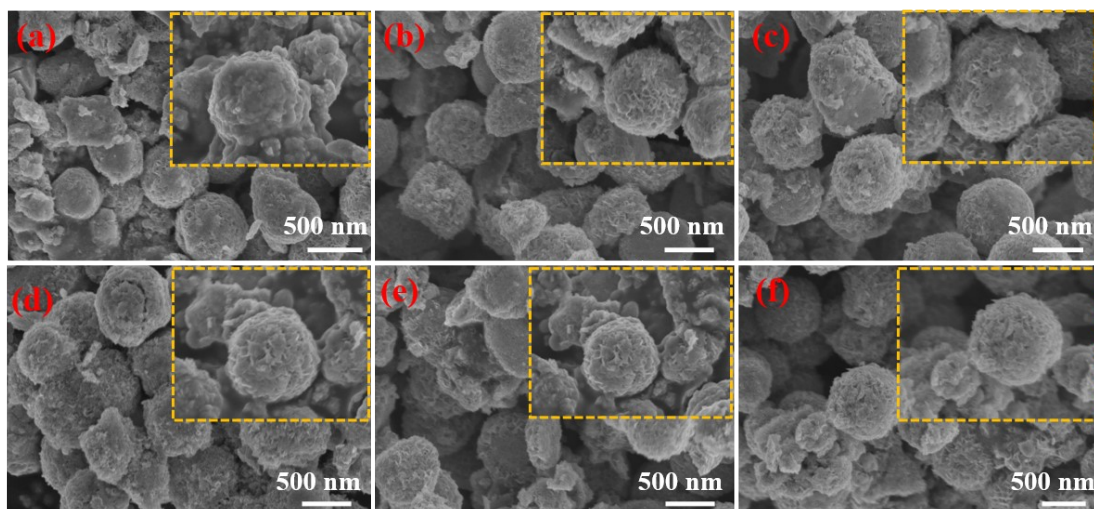

**Fig. S17.** SEM images of post-cycled (a) MoS<sub>2</sub>@C, (b) MoS<sub>1.8</sub>Se<sub>0.2</sub>, (c) MoS<sub>1.5</sub>Se<sub>0.5</sub>, (d) MoSSe, (e) MoS<sub>1.8</sub>Se<sub>0.2</sub>@C, (f) MoSSe@C.

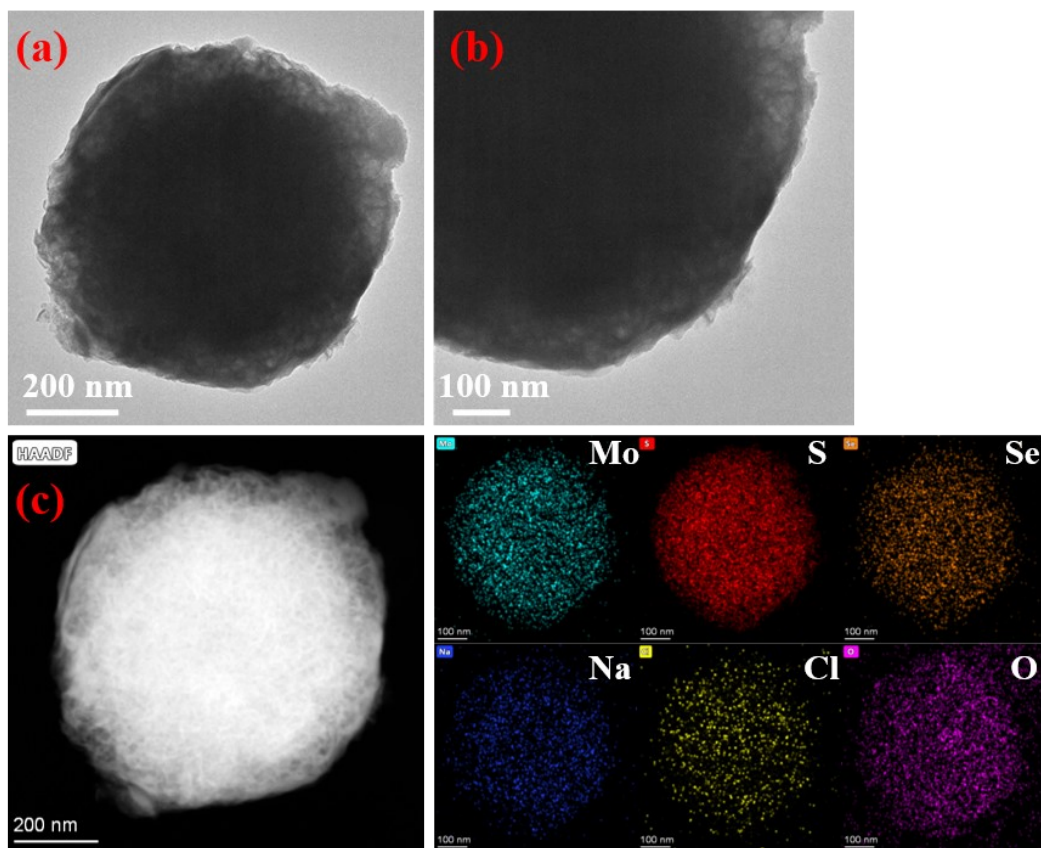

**Fig. S18.** (a,b) TEM, (c) Element mapping of post-cycled  $\text{MoS}_{1.5}\text{Se}_{0.5}$ .

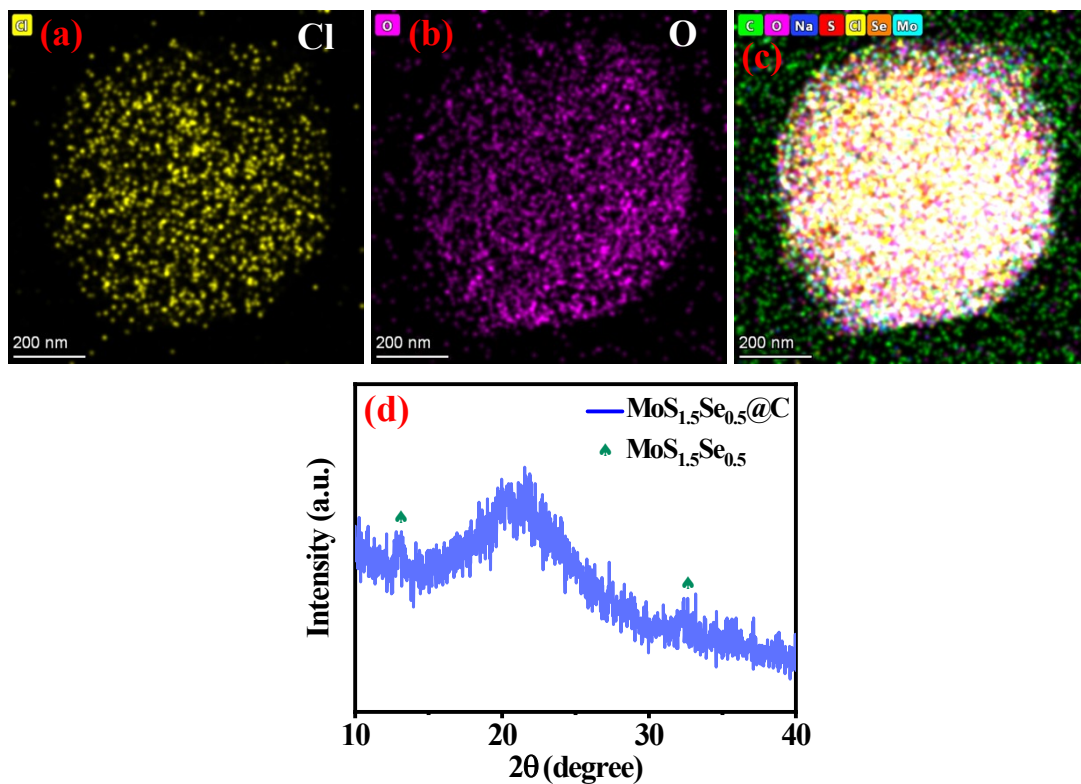

**Fig. S19.** (a-c) TEM-element mapping of post-cycled  $\text{MoS}_{1.5}\text{Se}_{0.5}@C$ . (d) post-cycled XRD pattern of  $\text{MoS}_{1.5}\text{Se}_{0.5}@C$ .

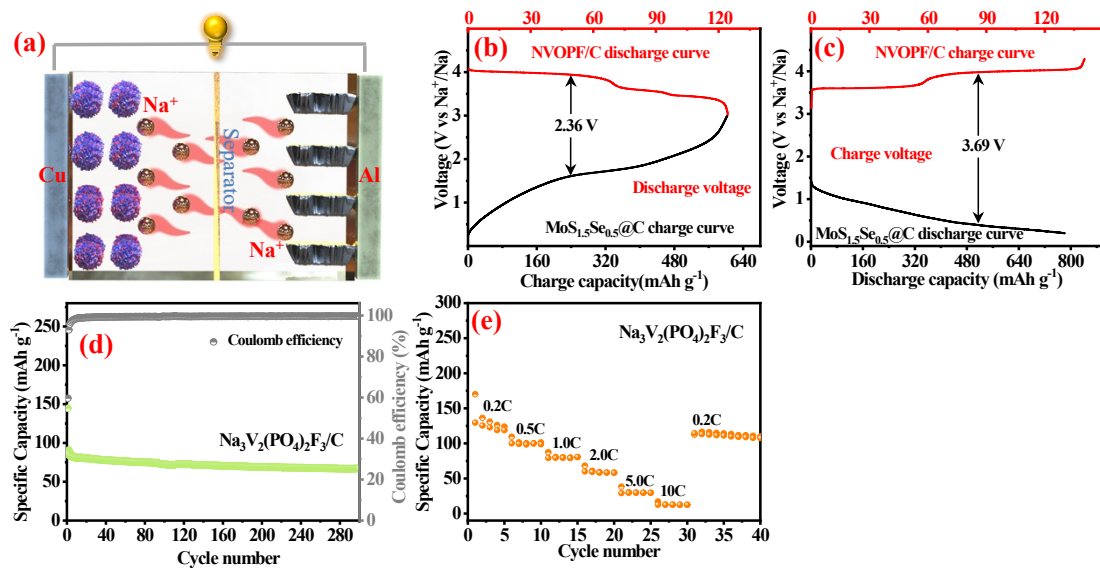

**Fig. S20.** Electrochemical performance of MoS<sub>1.5</sub>Se<sub>0.5</sub>@C//Na<sub>3</sub>V<sub>2</sub>(PO<sub>4</sub>)<sub>2</sub>F<sub>3</sub>/C. (a) Working mechanism diagram. (b, c) Na<sub>3</sub>V<sub>2</sub>(PO<sub>4</sub>)<sub>2</sub>F<sub>3</sub>/C discharge/ charge curve combined with MoS<sub>1.5</sub>Se<sub>0.5</sub>@C charge/ discharge curve. (d, e) the cycle and rate performance of Na<sub>3</sub>V<sub>2</sub>(PO<sub>4</sub>)<sub>2</sub>F<sub>3</sub>/C.

**Table S1.** Electrochemical performances comparison.

| Sample                                       | Current density<br>(A g <sup>-1</sup> ) | ICE (%)     | Reversible capacity<br>(mAh g <sup>-1</sup> ) | Cycle number | Ref.             |
|----------------------------------------------|-----------------------------------------|-------------|-----------------------------------------------|--------------|------------------|
| M-MoS <sub>2</sub> @HCS                      | 0.1                                     | 34.6        | 401.3                                         | 100          | 3                |
| MoSSeNSs@NC/hC-NC                            | 0.1                                     | 65          | 453                                           | 200          | 9                |
| Cu <sub>2</sub> S@carbon@MoS <sub>2</sub>    | 0.3                                     | 65          | 275                                           | 200          | 10               |
| MoS <sub>0.74</sub> Se <sub>1.26</sub> /NC   | 1                                       | 64          | 278                                           | 800          | 19               |
| MoSe <sub>2</sub> /N-PCD                     | 0.2                                     | 70.37       | 436                                           | 500          | 27               |
| 2H-MoS <sub>0.2</sub> Se <sub>1.8</sub> /rGO | 0.5                                     | 27          | 396                                           | 100          | 36               |
| <b>MoS<sub>1.5</sub>Se<sub>0.5</sub>@C</b>   | <b>1</b>                                | <b>77.3</b> | <b>368</b>                                    | <b>300</b>   | <b>This work</b> |



**Table S2.** Fitted electrochemical impedance value with corresponding Na<sup>+</sup> diffusion coefficients ( $D_{\text{Na}^+}$ ) of fresh MoS<sub>2</sub>@C, MoS<sub>1.8</sub>Se<sub>0.2</sub>, MoS<sub>1.5</sub>Se<sub>0.5</sub>, MoSSe, MoS<sub>1.8</sub>Se<sub>0.2</sub>@C, MoS<sub>1.5</sub>Se<sub>0.5</sub>@C and MoSSe@C electrode.

| Sample electrode                        | $R_s/\text{Ohm}$ | $R_f/\text{Ohm}$ | $R_{ct}/\text{Ohm}$ | $\sigma/\text{cm}^2 \text{ s}^{-1}$ | $D_{\text{Na}^+}/\text{cm}^2 \text{ s}^{-1}$ |
|-----------------------------------------|------------------|------------------|---------------------|-------------------------------------|----------------------------------------------|
| MoS <sub>2</sub> @C                     | 7.29             | 90.1             | 345                 | 400.2                               | $1.54 \times 10^{-13}$                       |
| MoS <sub>1.8</sub> Se <sub>0.2</sub>    | 5.14             | 52.9             | 181                 | 394.7                               | $1.58 \times 10^{-13}$                       |
| MoS <sub>1.5</sub> Se <sub>0.5</sub>    | 4.62             | 41.9             | 93.9                | 210.6                               | $5.56 \times 10^{-13}$                       |
| MoSSe                                   | 5.07             | 43.5             | 104                 | 234.3                               | $4.49 \times 10^{-13}$                       |
| MoS <sub>1.8</sub> Se <sub>0.2</sub> @C | 3.9              | 28.5             | 83.7                | 166.6                               | $8.88 \times 10^{-13}$                       |
| MoS <sub>1.5</sub> Se <sub>0.5</sub> @C | 3.2              | 18.9             | 60.7                | 65.9                                | $5.57 \times 10^{-12}$                       |
| MoSSe@C                                 | 3.7              | 21.2             | 66.1                | 95.2                                | $2.72 \times 10^{-12}$                       |

**Table S3.** Fitted electrochemical impedance value with corresponding Na<sup>+</sup> diffusion coefficients ( $D_{\text{Na}^+}$ ) of post-cycled MoS<sub>2</sub>@C, MoS<sub>1.8</sub>Se<sub>0.2</sub>, MoS<sub>1.5</sub>Se<sub>0.5</sub>, MoSSe, MoS<sub>1.8</sub>Se<sub>0.2</sub>@C, MoS<sub>1.5</sub>Se<sub>0.5</sub>@C and MoSSe@C electrode.

| Sample electrode                        | $R_s/\text{Ohm}$ | $R_f/\text{Ohm}$ | $R_{ct}/\text{Ohm}$ | $\sigma/\text{cm}^2 \text{ s}^{-1}$ | $D_{\text{Na}^+}/\text{cm}^2 \text{ s}^{-1}$ |
|-----------------------------------------|------------------|------------------|---------------------|-------------------------------------|----------------------------------------------|
| MoS <sub>2</sub> @C                     | 6.27             | 95.3             | 199                 | 311.2                               | $2.53 \times 10^{-13}$                       |
| MoS <sub>1.8</sub> Se <sub>0.2</sub>    | 5.06             | 47.6             | 172                 | 286.5                               | $3.00 \times 10^{-13}$                       |
| MoS <sub>1.5</sub> Se <sub>0.5</sub>    | 4.29             | 32.4             | 103                 | 187.7                               | $6.99 \times 10^{-13}$                       |
| MoSSe                                   | 4.49             | 49.7             | 137                 | 208.4                               | $5.67 \times 10^{-13}$                       |
| MoS <sub>1.8</sub> Se <sub>0.2</sub> @C | 3.45             | 23.4             | 27                  | 80.6                                | $3.79 \times 10^{-12}$                       |
| MoS <sub>1.5</sub> Se <sub>0.5</sub> @C | 2.59             | 15.5             | 17.9                | 50.6                                | $9.63 \times 10^{-12}$                       |
| MoSSe@C                                 | 3.33             | 20.6             | 21.6                | 75.2                                | $4.36 \times 10^{-12}$                       |

**Table S4.** The proportion of capacitive contribution when first discharge to 0.2V at different scan rates in MoS<sub>2</sub>@C, MoS<sub>1.8</sub>Se<sub>0.2</sub>@C, MoS<sub>1.5</sub>Se<sub>0.5</sub>@C and MoSSe@C.

| Scan rate (mV s <sup>-1</sup> )<br>Sample electrode | 0.2/% | 0.4/% | 0.6/% | 0.8/% | 1/%  | 2/%  |
|-----------------------------------------------------|-------|-------|-------|-------|------|------|
| MoS <sub>2</sub> @C                                 | 49.2  | 55.2  | 60.2  | 62.4  | 67.7 | 75.6 |
| MoS <sub>1.8</sub> Se <sub>0.2</sub> @C             | 66.8  | 74.2  | 79.9  | 82.3  | 83.9 | 86.9 |
| MoS <sub>1.5</sub> Se <sub>0.5</sub> @C             | 71.3  | 82.9  | 85.7  | 87.3  | 89.4 | 96.4 |
| MoSSe@C                                             | 68.6  | 76.8  | 80.2  | 83.6  | 85.8 | 88.8 |

**Table S5.** The proportion of capacitive contribution when first discharge to 0.005V at different scan rates in MoS<sub>2</sub>@C, MoS<sub>1.8</sub>Se<sub>0.2</sub>, MoS<sub>1.5</sub>Se<sub>0.5</sub>, MoSSe, MoS<sub>1.8</sub>Se<sub>0.2</sub>@C, MoS<sub>1.5</sub>Se<sub>0.5</sub>@C and MoSSe@C.

| Scan rate (mV s <sup>-1</sup> )         | 0.2/% | 0.4/% | 0.6/% | 0.8/% | 1/%  | 2/%  |
|-----------------------------------------|-------|-------|-------|-------|------|------|
| Sample electrode                        |       |       |       |       |      |      |
| MoS <sub>2</sub> @C                     | 38.9  | 45.6  | 51.3  | 59.5  | 60.5 | 63.9 |
| MoS <sub>1.8</sub> Se <sub>0.2</sub>    | 55.1  | 60.8  | 68.9  | 69.1  | 70.2 | 76.1 |
| MoS <sub>1.5</sub> Se <sub>0.5</sub>    | 61.3  | 69.5  | 72.5  | 75.5  | 79.8 | 80.3 |
| MoSSe                                   | 58.8  | 65.5  | 70.1  | 72.1  | 77.9 | 79.7 |
| MoS <sub>1.8</sub> Se <sub>0.2</sub> @C | 62.5  | 70.6  | 74.2  | 77.4  | 80.3 | 81.6 |
| MoS <sub>1.5</sub> Se <sub>0.5</sub> @C | 68.8  | 76.2  | 78.9  | 80.1  | 82.3 | 83.9 |
| MoSSe@C                                 | 65.6  | 73.2  | 76.7  | 79.9  | 80.9 | 83.1 |
